# Supplementary material for: Glycated Albumin Levels in Patients with Type 2 Diabetes Increase Relative to HbA1c with Time
Source: PubMed Central journal article supplement (PMC4592895; doi:10.1155/2015/576306), 2015-09-21
Supplement: 576306.f1.pdf [file 576306.f1.pdf]

**Supplementary Figure 1** Correlation between  $\Delta$ C-peptide and PCGR

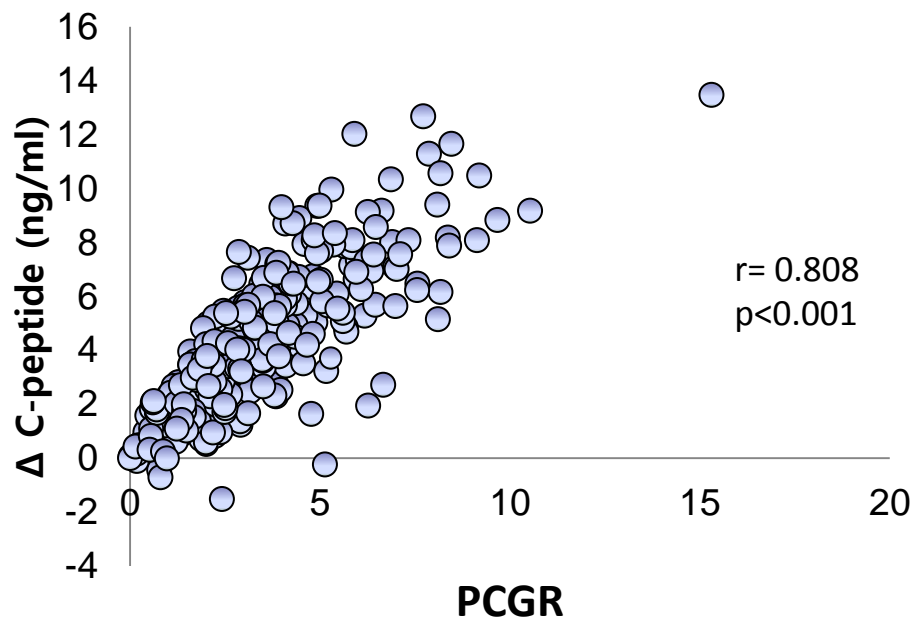

**Supplementary Table 1** Analyses to determine the variables associated with PCGR

| Variable                                               | Model 1*      |                  | Model 2**     |                  |
|--------------------------------------------------------|---------------|------------------|---------------|------------------|
|                                                        | STD $\beta$   | P                | STD $\beta$   | P                |
| Duration of diabetes (years)                           | <b>-0.133</b> | <b>0.010</b>     | <b>-0.212</b> | <b>&lt;0.001</b> |
| Insulin use at baseline (0=no, 1=yes)                  | <b>-0.119</b> | <b>0.029</b>     | <b>-0.264</b> | <b>&lt;0.001</b> |
| mean GA (%)                                            | <b>-0.336</b> | <b>&lt;0.001</b> | -             | -                |
| mean HbA <sub>1c</sub> (%)                             | -0.058        | 0.452            | -             | -                |
| $\Delta$ GA/HbA <sub>1c</sub> (end-point, nadir-point) | -             | -                | <b>-0.107</b> | <b>0.032</b>     |

\*Model 1 was adjusted for age (years), sex (0=female, 1=male), body mass index (kg/m<sup>2</sup>), waist circumference (cm), hypertension (0=no, 1=yes), and estimated glomerular filtration rate (ml/min/1.73m<sup>2</sup>). \*\*Model 2 was additionally adjusted for  $\Delta$ GA/HbA<sub>1c</sub> (end-point, baseline). Values with statistical significance are printed in bold.
